# Supplementary material
Source: Research Square preprint supplement (doi:10.21203/rs.3.rs-9318515/v1)
Supplement: Supplementary file 2 [file 9ddbd8aaaac66ffb15b89f07.docx]

# **Table 2.** Key characteristics of access, cost, processing, and dispensing across 1,134 records

|  | **n** | **%** | **% valid** |
| --- | --- | --- | --- |
| **Stock availability** |  |  |  |
| Yes, in all centres | 310 | 27·3 | 31·1 |
| Yes, in reference centres | 161 | 14·2 | 16·1 |
| No | 526 | 46·4 | 52·8 |
| ND | 137 | 12·1 | — |
| **Cost to the user (administration contribution to payment)** | | | |
| Free of charge (full contribution) | 33 | 2·9 | 5·0 |
| Co-payment (reduced contribution) | 312 | 27·5 | 47·1 |
| Full payment (no contribution) | 317 | 28·0 | 47·9 |
| ND | 472 | 41·6 | — |
| **Request processing** | | | |
| Physician with hospital pharmacy | 405 | 35·7 | 72·1 |
| Physician with regional health authority | 47 | 4·1 | 8·3 |
| Patient with hospital pharmacy | 33 | 2·9 | 5·9 |
| Patient with regional health authority | 77 | 6·8 | 13·7 |
| ND | 562 | 52·5 | — |
| **Dispensing site** | | | |
| Hospital pharmacy | 466 | 41·2 | 45·3 |
| Community pharmacy | 219 | 19·3 | 21·3 |
| Community or hospital pharmacy, depending on circumstances | 160 | 14·1 | 15·6 |
| Territorial service | 123 | 10·8 | 12·0 |
| Other | 60 | 5·3 | 5·8 |
| ND | 106 | 9·3 | — |
