# Supplementary material
Source: Research Square preprint supplement (doi:10.21203/rs.3.rs-9318515/v1)
Supplement: Supplementary file 3 [file a396a356125e0a338868d1dc.docx]

# **Table 1**. Basic characteristics of 63 medicines and vaccines related to neglected tropical diseases

| **NTD medicines and vaccines** | **N= 63** |
| --- | --- |
| Active substances / Immunotherapy / Vaccine | 41 |
| Route of administration |  |
| Oral | 40 |
| Intravenous | 16 |
| Intramuscular | 3 |
| Subcutaneous | 1 |
| Topical | 1 |
| Intravenous / Intramuscular / Intralesional | 1 |
| Type of access |  |
| Special Situations Medicine (foreign) | 39 |
| Marketed in Spain | 22 |
| No data | 2 |
| Special Situations Medicine processing |  |
| Special authorisation | 28 |
| Special authorisation with manufacturer agreement | 1 |
| Stock availability | 10 |
| Package price (€) |  |
| Mean (± SD) | 304·90 (± 769·96) |
| Median (P25–P75) | 33·56 (6·48–159·40) |
| Range (min–max) | 1·66–3,952·00 |
